# Supplementary material
Source: Royal Society of Chemistry journal article supplement (doi:10.1039/d6dt00528d)
Supplement: d6dt00528d1.pdf [file d6dt00528d1.pdf]

# Tubular Structural Construction and Compositional Modulation of MoS<sub>2</sub>-based Hybrids for High-performance Catalytic Application

Tianjun Pan<sup>a‡</sup>, Zexian Cui<sup>b‡</sup>, Suping Han<sup>c\*</sup>, Huanhuan Li<sup>a</sup>, Jingli Xu<sup>a</sup>, Xue-Bo Yin<sup>a</sup>, Min Zhang<sup>a\*</sup>

<sup>a</sup>College of Chemistry and Chemical Engineering, Shanghai University of Engineering Science, Shanghai 201620, PR China. E-mail: [zhangmin@sues.edu.cn](mailto:zhangmin@sues.edu.cn).

<sup>b</sup>Woodberry Forest School, VA 22989, USA.

<sup>c</sup> Department of Pharmacy, Shandong Medical College., No. 5460 Erhuannanlu Road, Jinan 250002, China, [supinghan@163.com](mailto:supinghan@163.com).

<sup>‡</sup>These authors contributed equally to this work.

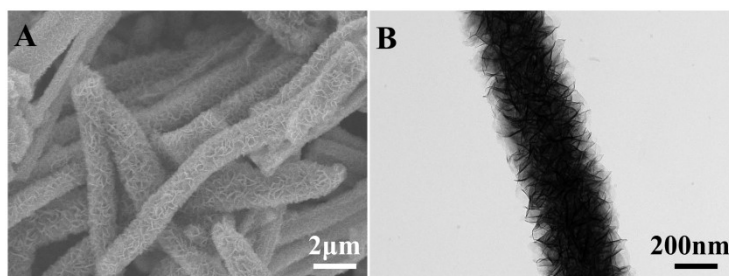

Figure S1 The SEM(A) and TEM(B) images of APTES@MoS<sub>2</sub>

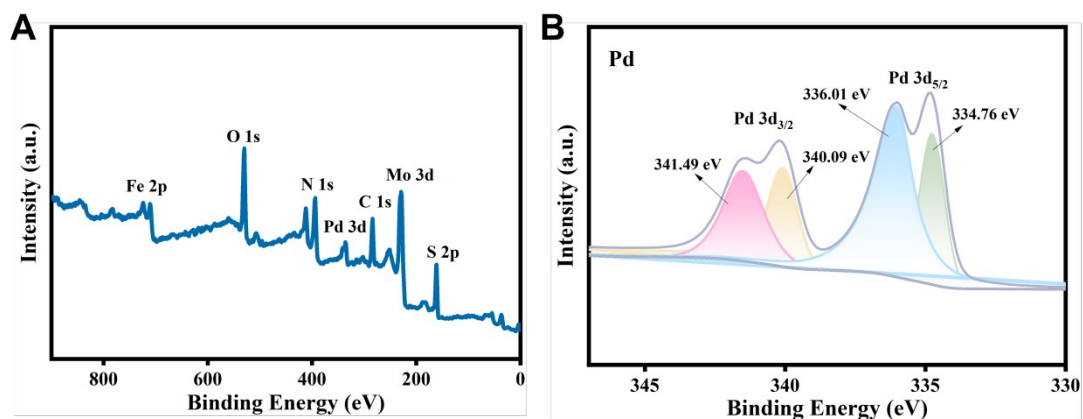

Figure S2(A) XPS spectrum of Survey of Fe-MoS<sub>2</sub>/Pd@CAPTES, (B) XPS spectrum of Pd 3d of Fe-MoS<sub>2</sub>/Pd@CAPTES

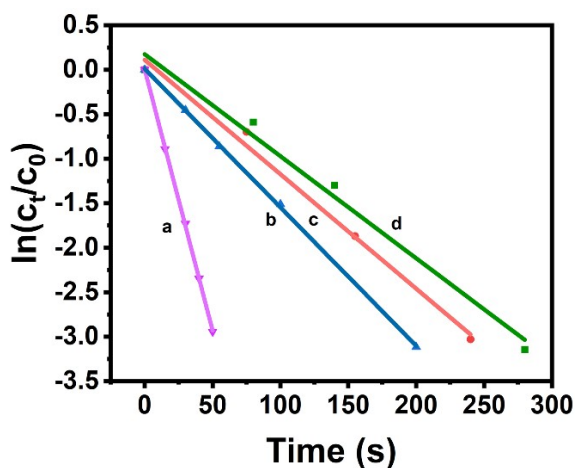

Figure S3 The fitting curve of  $\ln(C_t/C_0)$  and time by Fe-MoS<sub>2</sub>/Pd@CAPTES(a) , Fe-MoS<sub>2</sub>@CAPTES(b), Ni-MoS<sub>2</sub>@CAPTES(c), Co-MoS<sub>2</sub>@CAPTES(d).

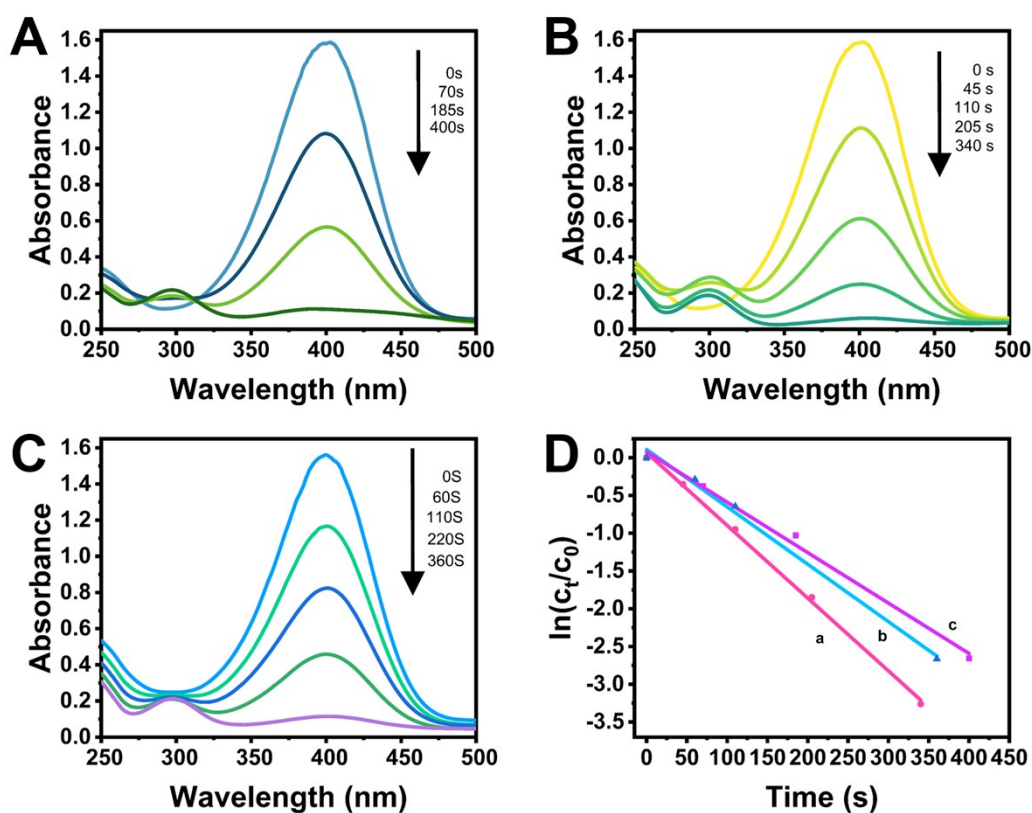

Figure S4 UV-vis absorption spectra during the reduction of 4-NP using (A) APTES@MoS<sub>2</sub>/Co<sup>2+</sup>, (B) APTES@MoS<sub>2</sub>/Fe<sup>3+</sup>, (C) APTES@MoS<sub>2</sub>/Ni<sup>2+</sup>, and (D) Fe-MoS<sub>2</sub>/Pd@CAPTES. (D) The fitting curve of  $\ln(C_t/C_0)$  and time by APTES@MoS<sub>2</sub>/Fe<sup>3+</sup>(a), APTES@MoS<sub>2</sub>/Ni<sup>2+</sup>, APTES@MoS<sub>2</sub>/Co<sup>2+</sup> (c).

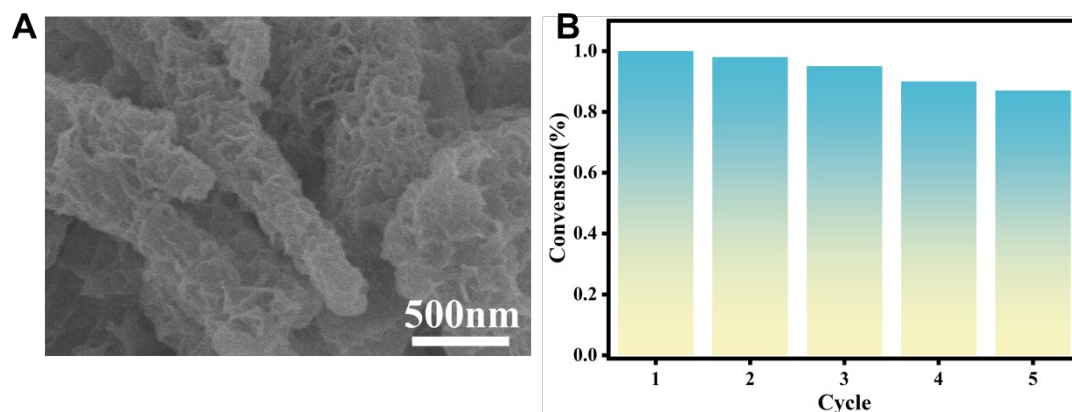

Figure S5 (A, B) The SEM images of Fe-MoS<sub>2</sub>/Pd@CAPTES after five catalytic reactions. (C) The cycle test of the representative Fe-MoS<sub>2</sub>/Pd@CAPTES
